# Supplementary material for: Machine Learning Radiomics Signature for Differentiating Lymphoma versus Benign Splenomegaly on CT
Source: MDPI journal article supplement (doi:10.3390/diagnostics13243632), 2023-12-08
Supplement: s1 [file s1]

**Supplementary Table S1. Analysis of radiomics features with significant difference on Mann-Whitney test and individual values of features**

|                         |                        | Lymphoma (n=19) |               | Benign (n=120) |               | Lymphoma vs. Benign |
|-------------------------|------------------------|-----------------|---------------|----------------|---------------|---------------------|
|                         |                        | Mean            | SD            | Mean           | SD            | P-value             |
| <b>First statistics</b> | Energy                 | 5194434849.53   | 3833187888.34 | 2173098373.37  | 2280644808.64 | 0.003               |
|                         | Mean                   | 87.33           | 13.92         | 112.24         | 27.71         | <0.001              |
|                         | Median                 | 88.84           | 15.04         | 115.10         | 28.33         | <0.001              |
|                         | Minimum                | -507.00         | 772.05        | -100.15        | 194.76        | 0.034               |
|                         | Percentile_10          | 64.16           | 16.22         | 89.78          | 28.25         | <0.001              |
|                         | Percentile_90          | 108.68          | 15.76         | 132.82         | 28.07         | <0.001              |
|                         | Range                  | 785.68          | 810.96        | 344.98         | 238.86        | 0.030               |
|                         | Root Mean Squared self | 89.61           | 13.95         | 114.49         | 27.58         | <0.001              |
| <b>GLCM</b>             | Total Energy           | 5194434849.53   | 3833187888.34 | 2173098373.37  | 2280644808.64 | 0.003               |
|                         | Correlation            | 0.428           | 0.159         | 0.34           | 0.07          | 0.027               |
|                         | Idmn                   | 0.997           | 0.003         | 0.99           | 0.003         | 0.002               |
|                         | Idn                    | 0.970           | 0.020         | 0.96           | 0.01          | <0.001              |
|                         | Joint Average          | 596.16          | 774.20        | 215.34         | 194.73        | 0.047               |
|                         | MCC                    | 0.66            | 0.20          | 0.50           | 0.14          | 0.002               |
|                         | Sum Average            | 1192.32         | 1548.40       | 430.68         | 389.45        | 0.047               |
|                         |                        |                 |               |                |               |                     |
| <b>GLDM</b>             | Dependence NU          | 493506.94       | 385523.33     | 112935.65      | 101254.79     | <0.001              |
|                         | Gray Level NU          | 13096.84        | 11032.24      | 2905.07        | 2859.84       | <0.001              |
|                         | Small DLGLE            | 0.0000201       | 0.000023      | 0.000047       | 0.000027      | <0.001              |
| <b>GLRLM</b>            | Run Length NU          | 667020.06       | 518512.22     | 151966.70      | 136861.92     | <0.001              |
| <b>GLSZM</b>            | Low GLZE               | 0.00002         | 0.00003       | 0.000054       | 0.0000303     | <0.001              |
|                         | Size Zone NU           | 530334.07       | 413974.7      | 121144.62      | 108826.99     | <0.001              |
|                         | Small Area Low GLE     | 0.000023        | 0.000026      | 0.000049       | 0.000025      | <0.001              |
| <b>NGTDM</b>            | Coarseness             | 0.000028        | 0.000035      | 0.000083       | 0.000069      | <0.001              |



|                 |                        |            |            |           |           |        |
|-----------------|------------------------|------------|------------|-----------|-----------|--------|
| <b>Shape 3D</b> | Compactness1           | 0.0063     | 0.0015     | 0.0055    | 0.0012    | 0.010  |
|                 | Compactness2           | 0.015      | 0.0065     | 0.011     | 0.0047    | 0.004  |
|                 | Flatness               | 0.032      | 0.011      | 0.022     | 0.009     | <0.001 |
|                 | Least Axis Length      | 26.11      | 9.28       | 13.06     | 5.88      | <0.001 |
|                 | Major Axis Length      | 864.69     | 324.16     | 596.01    | 158.94    | 0.002  |
|                 | Max 2D Diameter Column | 1083.00    | 449.74     | 798.26    | 416.80    | 0.007  |
|                 | Max 2D Diameter Row    | 156.06     | 36.82      | 102.03    | 39.83     | <0.001 |
|                 | Max 2D Diameter Slice  | 1065.00    | 436.71     | 699.75    | 278.44    | 0.002  |
|                 | Max 3D Diameter        | 1157.08    | 460.24     | 903.94    | 471.52    | 0.031  |
|                 | Mesh Volume            | 1963468.06 | 1404451.31 | 431867.23 | 392970.98 | <0.001 |
|                 | Minor Axis Length      | 125.35     | 27.67      | 84.87     | 34.55     | <0.001 |
|                 | Sphericity             | 0.24       | 0.04       | 0.22      | 0.03      | 0.015  |
|                 | Surface Area           | 296353.08  | 154639.65  | 112630.40 | 60524.34  | <0.001 |
|                 | Surface Volume Ratio   | 0.19       | 0.09       | 0.36      | 0.15      | <0.001 |
|                 | Voxel Volume           | 1963884.95 | 1404635.67 | 432121.69 | 392999.31 | <0.001 |

Note.—GLCM, Gray Level Co-occurrence Matrix; GLDM, Gray Level Dependence Matrix; GLRLM, Gray Level Run Length Matrix; GLSZM, Gray Level Size Zone Matrix; NGTDM, Neighboring Gray Tone Difference Matrix; NU, Non Uniformity; GLE, Gray Level Emphasis; DLGLE, Dependence Low Gray Level Emphasis; GLZE, Gray Level Zone Emphasis.
